# Supplementary material
Source: HighWire-hosted journal article supplement (https://cmaj.ca/highwire/filestream/80545/field_highwire_adjunct_files/0/202468-image-1-at.pdf)

**Figure S1:** A chest radiograph taken during the patient's first hospitalization, showing a right-sided pneumonia and large pleural effusion

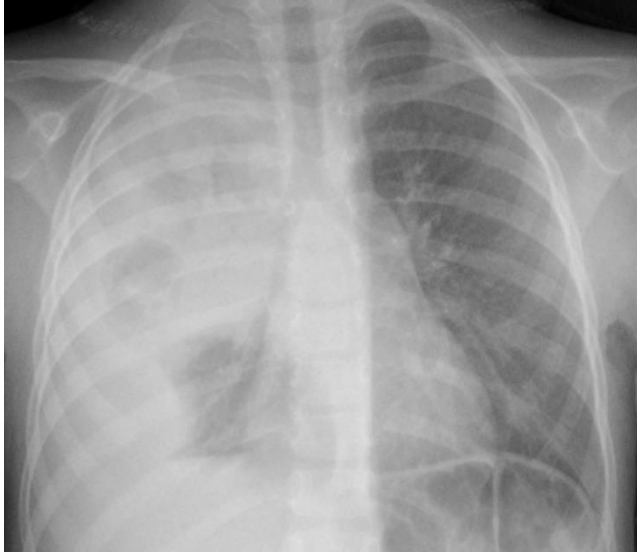

**Figure S2:** A chest radiograph done 8 months after presentation, showing complete resolution of the hydropneumothorax without procedural intervention

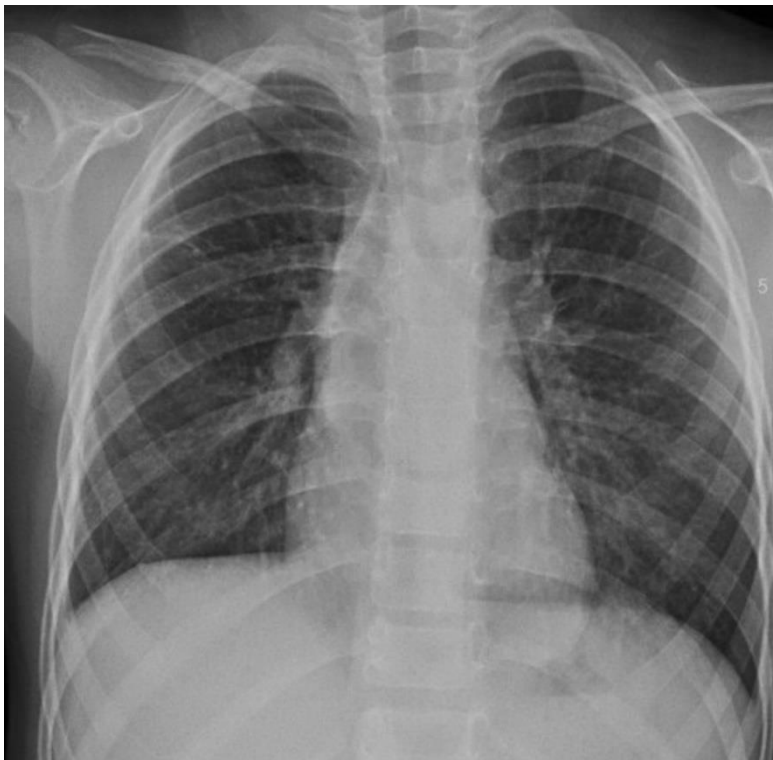

Supplement: 202468-image-1-at.pdf [file 202468-image-1-at.pdf]
